# Supplementary material for: Synthesis, Characterisation and Biological Evaluation of Ampicillin–Chitosan–Polyanion Nanoparticles Produced by Ionic Gelation and Polyelectrolyte Complexation Assisted by High-Intensity Sonication
Source: MDPI journal article supplement (doi:10.3390/polym11111758), 2019-10-25
Supplement: s1 [file s1]

## Support material

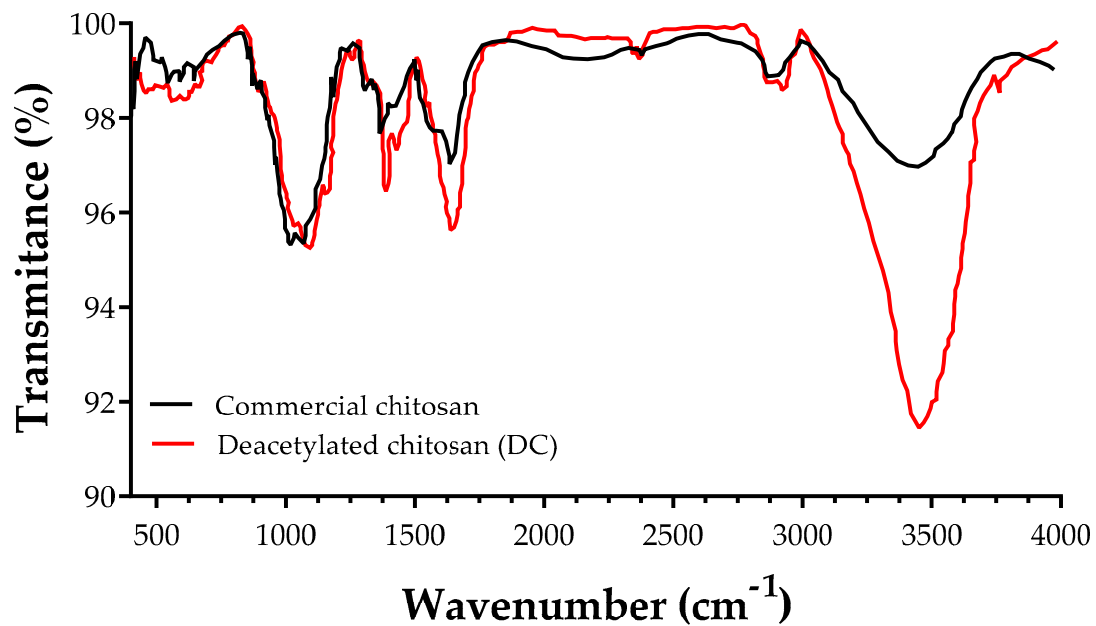

**Figure S1.** Infrared spectrum for commercial chitosan and alkali-processed chitosan with a degree of deacetylation > 90% (chitosan deacetyl)
